# Supplementary material for: Mesoporous (001)-TiO2 nanocrystals with tailored Ti3+ and surface oxygen vacancies for boosting photocatalytic selective conversion of aromatic alcohols
Source: Royal Society of Chemistry journal article supplement (doi:10.1039/d1cy00053e), 2021-01-01
Supplement: d1cy00053e1.pdf [file d1cy00053e1.pdf]

*Supporting Information*

**Mesoporous (001)-TiO<sub>2</sub> nanocrystals with tailoring Ti<sup>3+</sup> and surface oxygen vacancies for boosting photocatalytic selective conversion of aromatic alcohols**

**Dianfeng Li, Jinguo Wang\*, Fengxia Xu, Nianchen Zhang and Yong Men**

*School of Chemistry and Chemical Engineering, Shanghai University of Engineering  
Science, Shanghai 201620, P. R. China*

\*Corresponding author, E-mail address: [Jinguowang1982@sues.edu.cn](mailto:Jinguowang1982@sues.edu.cn), Tel: +86-21  
6787 4046; Fax: +86-21 6779 1215

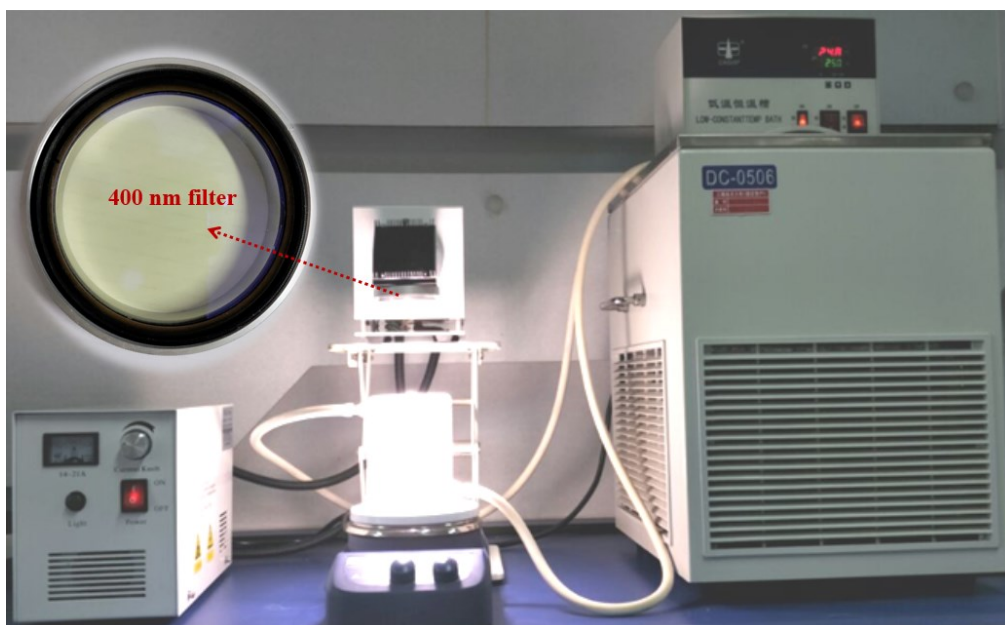

**Fig. S1.** Photograph of reaction system for photocatalytic selective conversion of aromatic alcohols.

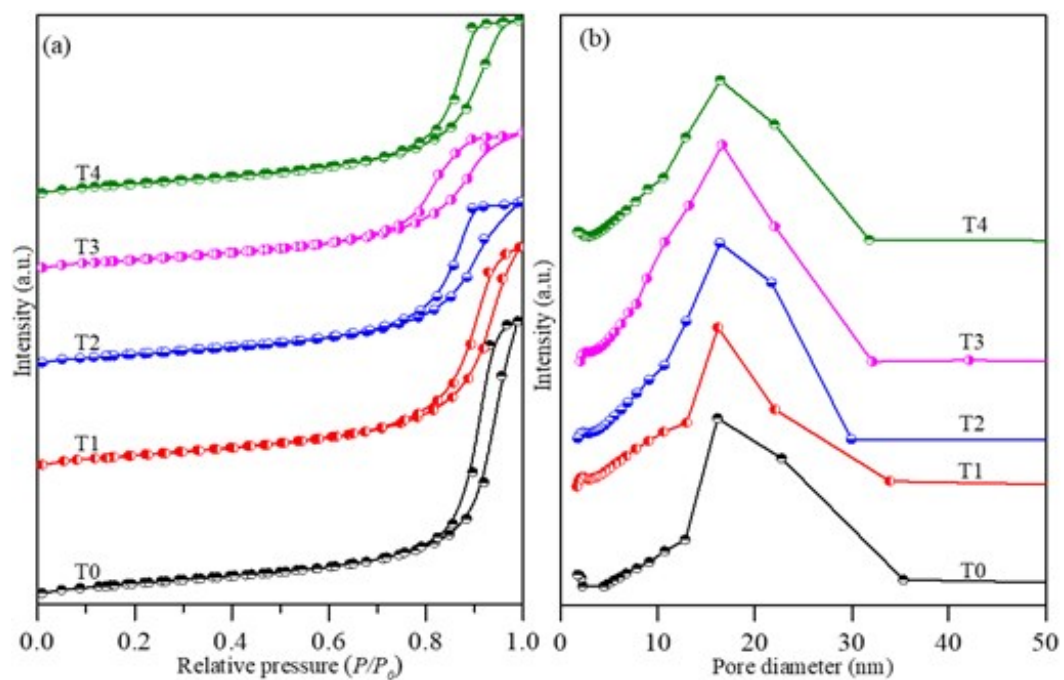

**Fig. S2.**  $N_2$  adsorption-desorption isotherms (a) and pore size distribution curves (b) of different photocatalysts.

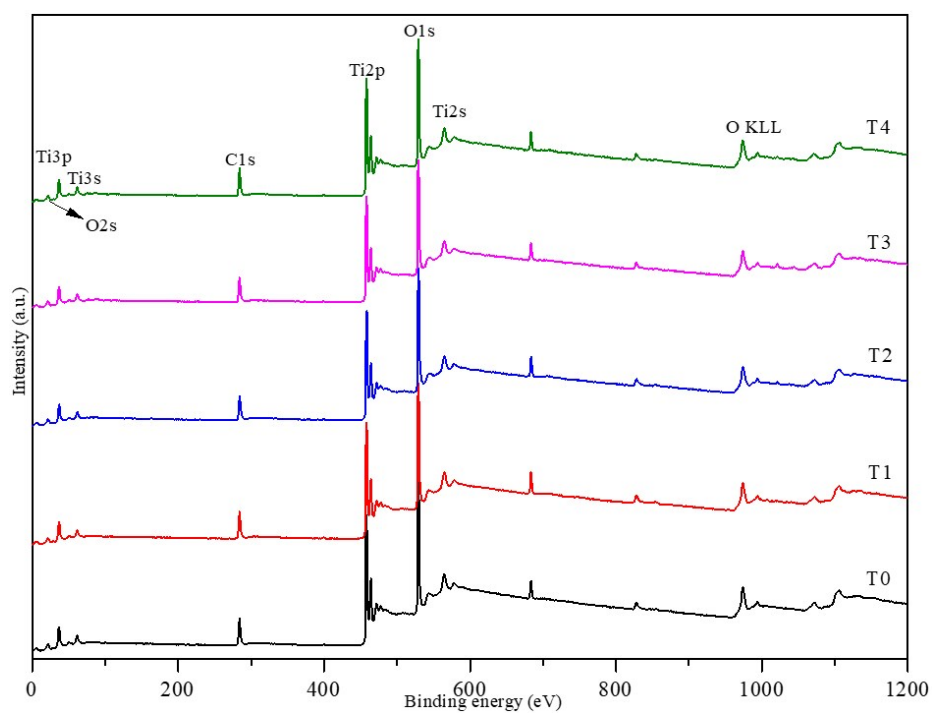

**Fig. S3.** XPS surveys of different photocatalysts.

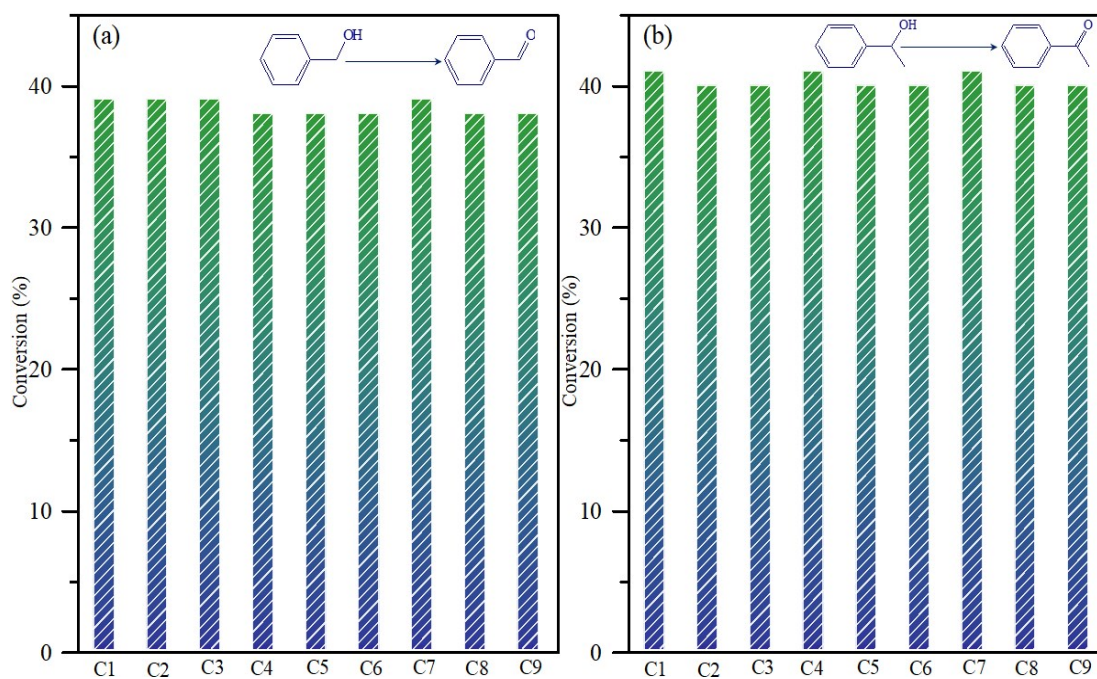

**Fig. S4.** Recycling test of T3 for selective conversion of benzyl alcohol (a) and 1-phenylethanol (b). The error bar of conversion is  $\pm 1.0\%$ .

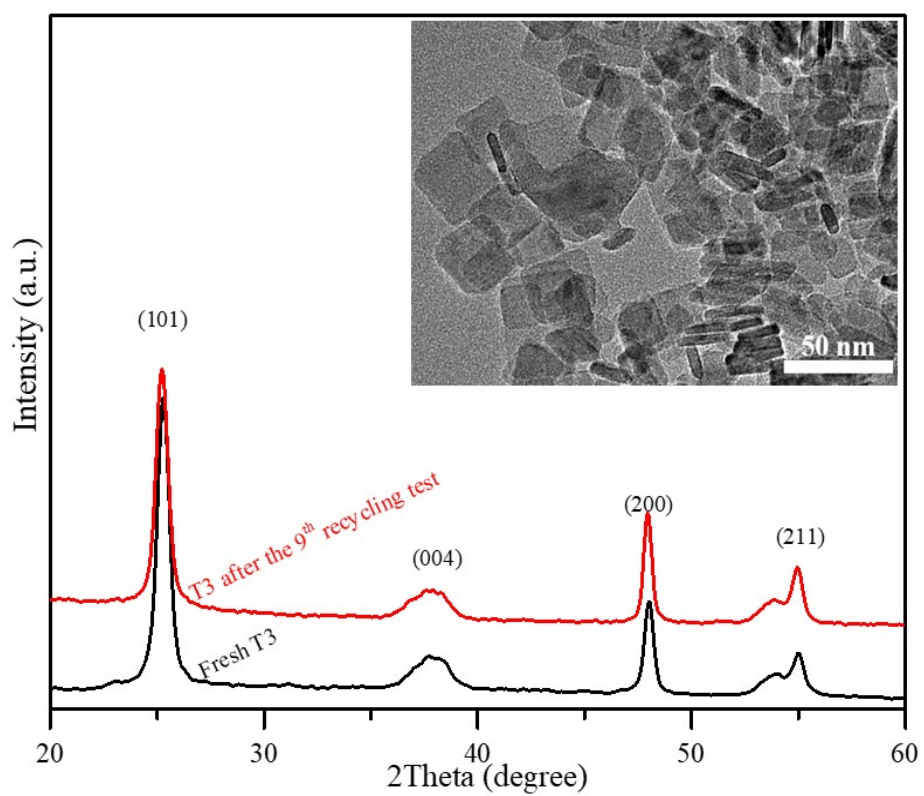

**Fig. S5.** TEM image and XRD pattern of T3 for selective conversions of benzyl alcohol and 1-phenylethanol after the 9<sup>th</sup> recycling test.
